# Supplementary material for: A small mitochondrial protein present in myzozoans is essential for malaria transmission
Source: PubMed Central journal article supplement (PMC4852462; doi:10.1098/rsob.160034), 2016-04-06
Supplement: rsob160034supp1.pdf [file rsob160034supp1.pdf]

## Supplementary information

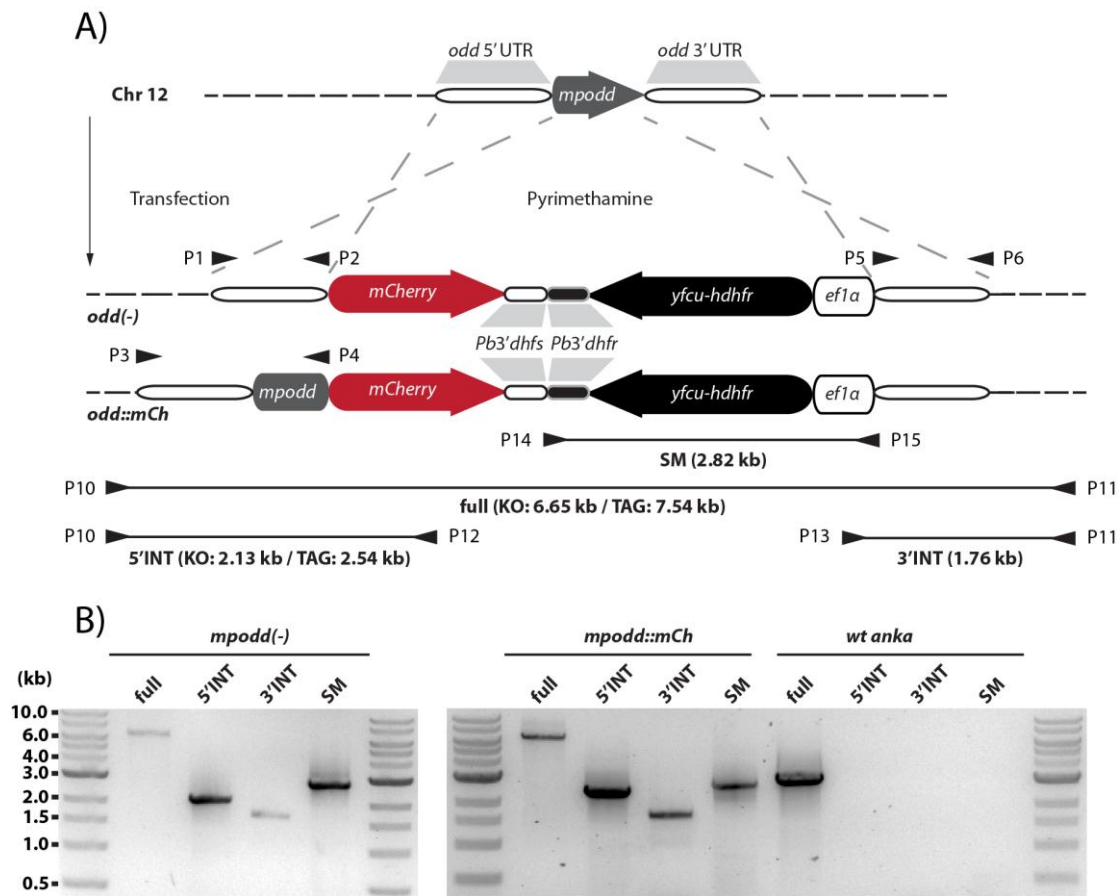

**Figure S1. Generation and PCR analysis of *mpodd(-)* and *mpodd::mCh* parasite lines**

Schematic representation of knockout and tagging strategy. A) *mpodd(-)* parasites were generated by transfection of wild-type (WT) ANKA with a vector containing the mCherry gene and a fusion of the positive selectable marker *hdhfr* (human dihydrofolate reductase) with the negative marker *yfcu* (yeast cytosine deaminase and uridyl phosphoribosyl transferase) under control of the *P. berghei ef1a* promoter and the *3'dhfr* terminator. This construct was flanked by 1kb sequences upstream and downstream of the *mpodd* gene to generate a replacement by double crossover homologous recombination. *mpodd::mCh* parasites were generated in the same way but the transfected DNA contained beside the 5' flanking sequence the complete open reading frame (ORF) of *mpodd* fused c-terminally to the mCherry gene. Parasites that successfully integrated the constructs were positively selected with pyrimethamine and cloned as previously described. Location of primers and

length of PCR fragments used for genotyping are indicated. B) PCR analysis of *mpodd(-)* and *mpodd::mCh* parasites showing positive integration at the 5' (5'INT) and 3' (3'INT) end as well as the presence of the selection marker (SM). Tagging of *mpodd* results in increased sizes of PCR products for 5' integration (5'INT) and the complete locus (full). Control PCRs with wild-type parasites showed no products for primers binding within the construct. The amplification of the whole locus (full) in WT parasites results in a smaller band compared to *mpodd(-)* and *mpodd::mCh* indicating that no integration took place.

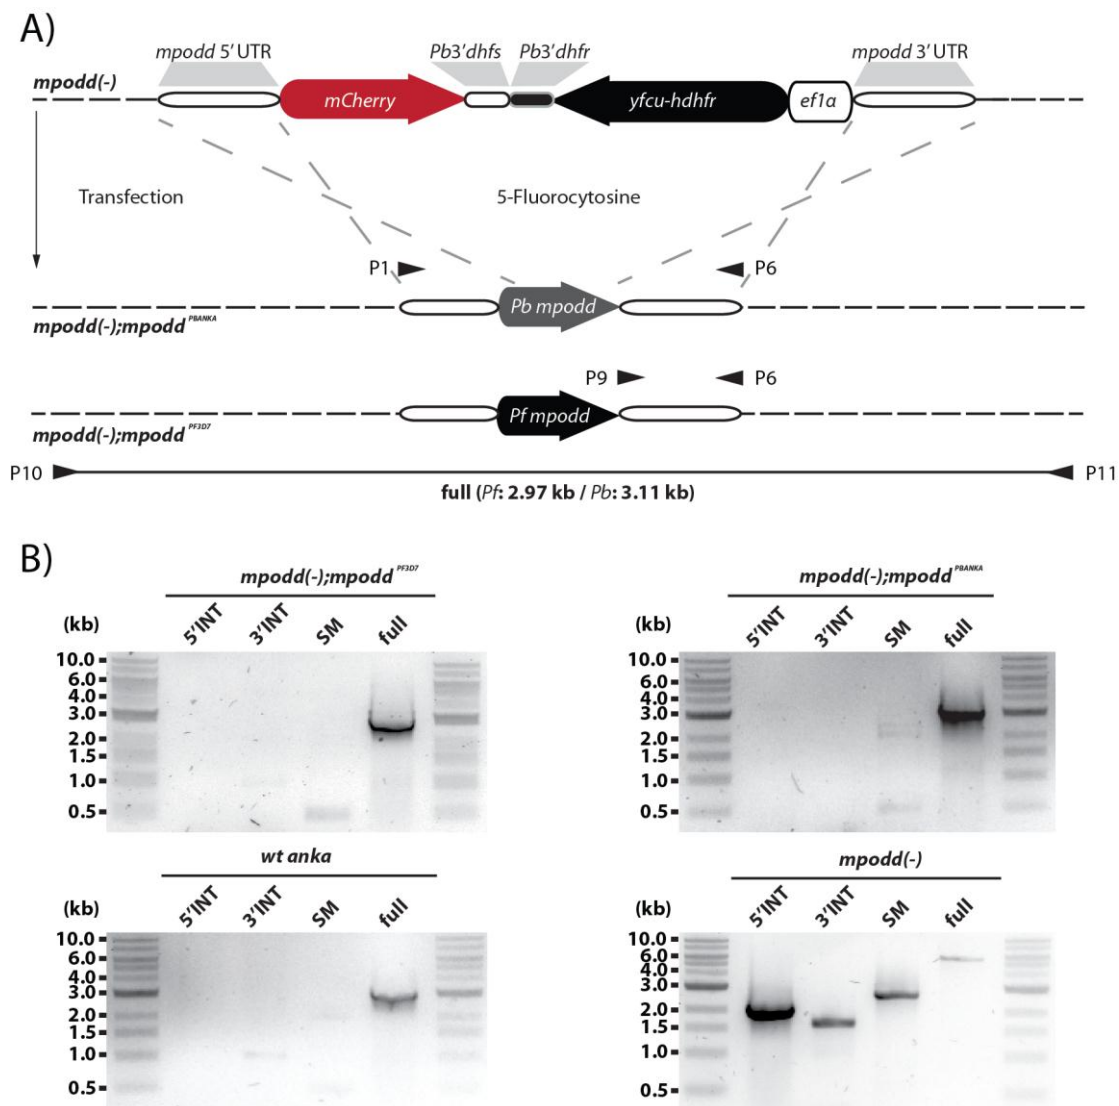

**Figure S2. Generation and PCR analysis of the complemented parasite lines *mpodd(-);mpodd<sup>PBANKA</sup>* and *mpodd(-);mpodd<sup>PF3D7</sup>***

Schematic representation of complementation strategy A) *mpodd(-)* parasites were complemented with *Pb mpo* as well as the homologue *Pf mpo* from *P. falciparum* 3D7. Knockout parasites were either transfected with DNA containing the *Pb mpo* gene or the intron-less *Pf mpo* gene. ORFs were flanked by 1kb sequences downstream and upstream of the native locus on chromosome 12 from *P. berghei* for double crossover homologous recombination. *mpodd(-);mpodd<sup>PBANKA</sup>*, and *mpodd(-);mpodd<sup>PF3D7</sup>* parasites were selected with 5-fluorocytosine and cloned. Location of primers and length of PCR fragments used for genotyping are indicated. B) All complementations as well as WT show no PCR products with primers which bind within mCherry or the positive-negative selection cassette *hdhfr-yfcu* (5'INT, 3'INT and SM). PCR products for the complete locus (full) of complemented parasite lines show no difference to WT indicating that the native conditions are restored. Sequencing of the complete locus (full) of *mpodd(-);mpodd<sup>PBANKA</sup>* and *mpodd(-);mpodd<sup>PF3D7</sup>* parasites showed correct complementation.

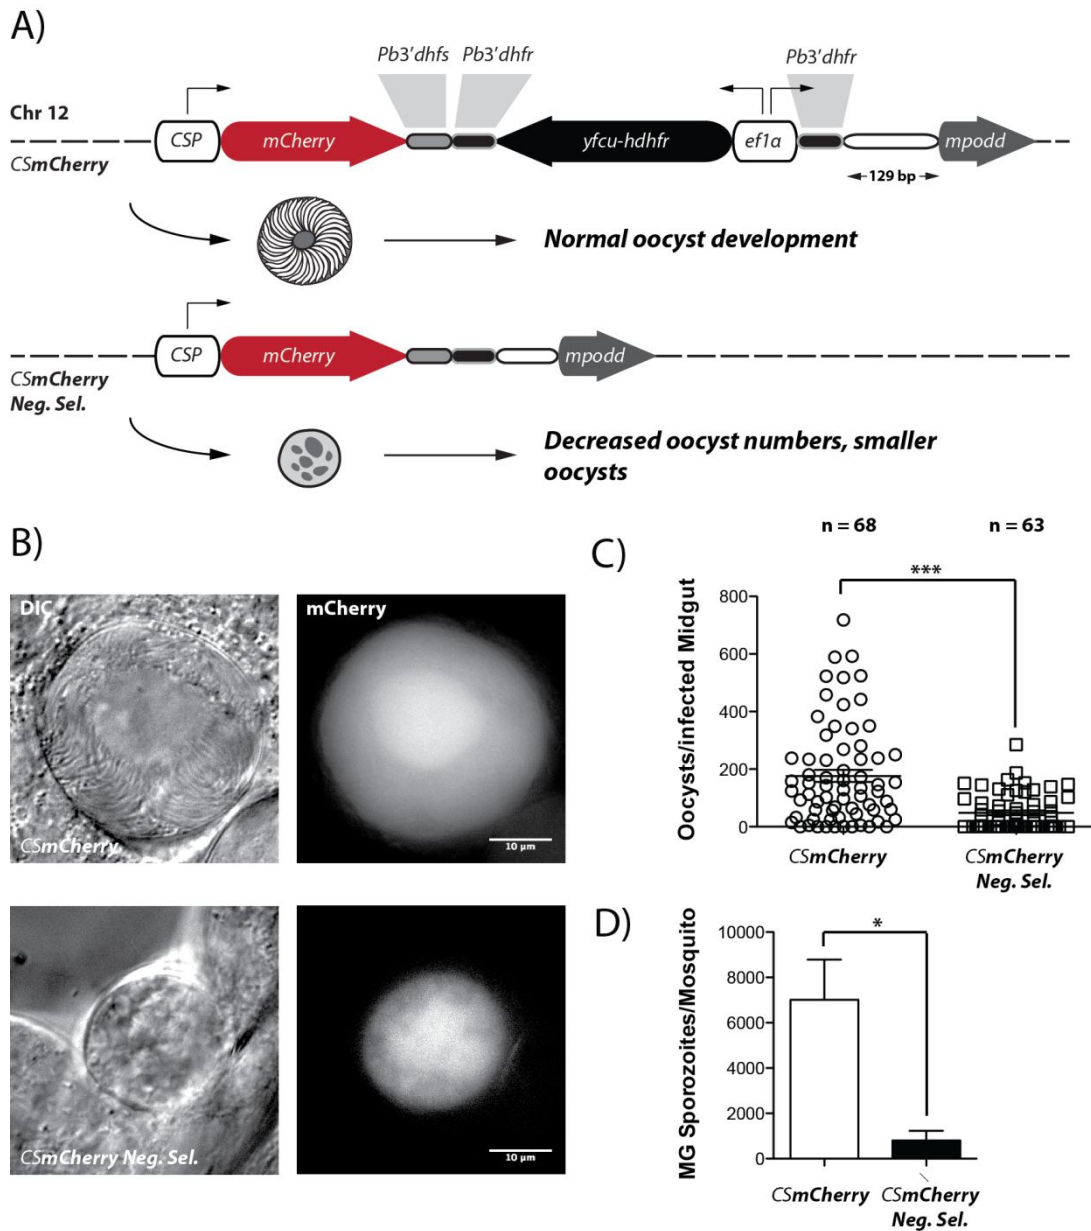

**Figure S3. Integration on chromosome 12 can affect malaria transmission**

Schematic representation of the gene integration strategy in chromosome 12 prior and after negative selection. A) Shown are transgenic lines expressing the fluorescence marker mCherry under regulation of the circumsporozoite protein (*CSP*) promoter. The directionality of promoter activity is indicated by arrows (*CSP* and *ef1a*). Note that *ef1a* shows bi-directional promoter activity. B) Images of representative oocysts 12 days post infection. Scale bar: 10 μm. C) and D) Numbers of oocysts and midgut sporozoites 11-13 days post

infection. Shown is the mean and standard error of three infection experiments. \*\*\* $p < 0.001$  (Mann-Whitney two-tailed test), \* $p < 0.05$  (Mann-Whitney one-tailed test).

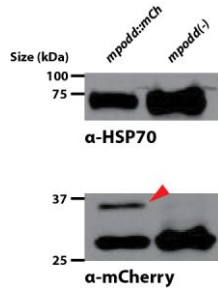

**Figure S4. Expression of mCherry tagged MPODD in schizont cultures of *mpodd::mCh* and *mpodd(-)***

Western blot of *mpodd::mCh* and *mpodd(-)* schizont cultures probed with anti-mCherry and anti-HSP70 antibodies. The lower band represents mCherry (26 kDa) while the upper band shows the loading control HSP70 (75 kDa). The band representing the fusion protein MPODD::mCherry (37 kDa) is marked with a red arrowhead.

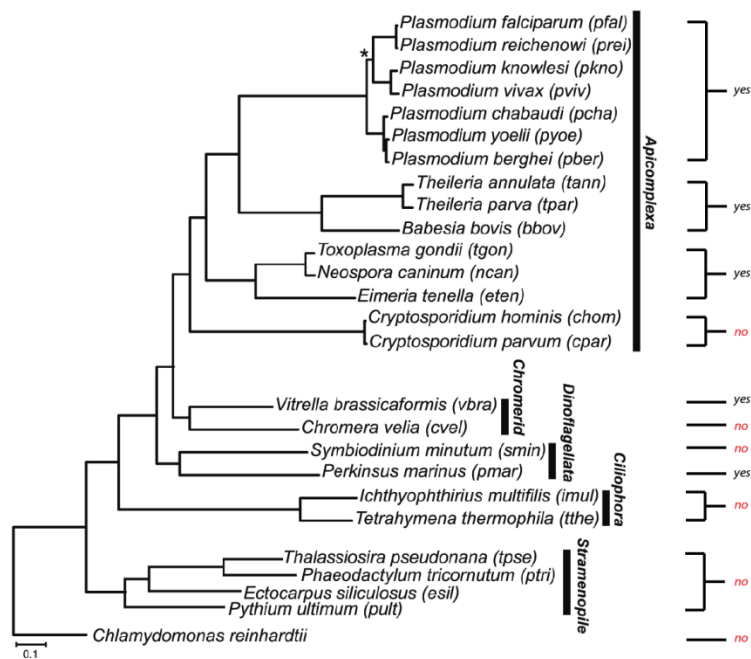

**Figure S5. Presence of MPODD homologues in Apicomplexa, chromerids and dinoflagellates**

The presence/absence of an MPODD homologue in a species is indicated on the right side of the phylogenetic tree (modified from [53]). The most ancient homologue was identified in the dinoflagellate *Perkinsus marinus* while no homologues could be identified in *Chromera velia*, *Symbodinium minutum* and *Cryptosporidium* species.

**Table S1. Primer sequences used.**

Primer sequences used for the generation of the different parasite lines, genotyping and performance of the reverse transcriptase (RT)-PCR.

**Table S2. Summary of quantification: *in vivo* experiments**

Data of *in vivo* experiments to determine blood stage growth rates and prepatencies of sporozoite infections of all generated parasite lines. Prepatencies are shown as the mean of all infected mice. N/D: not determined since mosquitoes were not observed to have sporozoites.

| Line                                                  | Asexual blood stage growth rate (fold/24h) | Bite back prepatency (d) (n=4) | 10000 sporozoites i.v. injection prepatency (d) (n=4) |
|-------------------------------------------------------|--------------------------------------------|--------------------------------|-------------------------------------------------------|
| wt anka                                               | 10.2 ± 1.1 (n=5)                           | 3.25                           | 3                                                     |
| <i>mpodd(-)</i>                                       | 9.0 ± 0.3 (n=3)                            | N/D                            | N/D                                                   |
| <i>P. berghei mpo</i><br><i>dd</i> complementation    | 8.8 (n=1)                                  | 3.75                           | 3                                                     |
| <i>P. falciparum mpo</i><br><i>dd</i> complementation | 10.3 ± 1.0 (n=3)                           | 3.25                           | 3.25                                                  |

**Table S3. Bioinformatic details of all MPODD homologues used in this study.**

Details about MPODD homologues used for complementation and sequence comparisons.

The following databases were queried: plasmodb v 26 ([www.plasmodb.org](http://www.plasmodb.org)); eupathdb v 26 ([www.eupathdb.org](http://www.eupathdb.org)); genbank ([www.ncbi.nlm.nih.gov](http://www.ncbi.nlm.nih.gov)).

| Species                                         | GeneID/EstID/Location        | search algorithm employed |         |          | RT-PCR |
|-------------------------------------------------|------------------------------|---------------------------|---------|----------|--------|
|                                                 |                              | blastP                    | tblastN | tblastN  |        |
|                                                 |                              | protein                   | EST     | genome   |        |
| <i>Plasmodium berghei</i> ANKA                  | PBANKA_1222220               | plasmodb                  |         |          | RT-PCR |
| <i>Plasmodium chabaudi chabaudi</i>             | PCHAS_1222850                | plasmodb                  |         |          |        |
| <i>Plasmodium yoelii yoelii</i> 17X             | PY17X_1225400                | plasmodb                  |         |          |        |
| <i>Plasmodium yoelii yoelii</i> YM              | PYYM_1224900                 | plasmodb                  |         |          |        |
| <i>Plasmodium falciparum</i> 3D7                | Pf3D7_08_v3(425171-424797)   |                           |         | plasmodb | RT-PCR |
| <i>Plasmodium vivax</i> Sal-I                   | Pv_SalI_chr01(439744-440244) |                           |         | plasmodb |        |
| <i>Plasmodium knowlesi</i> strain H             | PKNH_01_v2(484744-485255)    |                           |         | plasmodb |        |
| <i>Vitrella brassicaformis</i> CCMP3155         | Vbra_1532                    | eupathdb                  |         |          |        |
| <i>Sarcocystis neurona</i> SN3                  | SN3_01100145                 | eupathdb                  |         |          |        |
| <i>Toxoplasma gondii</i> GT1                    | TGGT1_223485                 | eupathdb                  |         |          | RT-PCR |
| <i>Toxoplasma gondii</i> VEG                    | TGVEG_223485                 | eupathdb                  |         |          |        |
| <i>Hammondia hammondi</i> strain H.H.34         | HHA_223485                   | eupathdb                  |         |          |        |
| <i>Sarcocystis neurona</i> SNI                  | SRCN_5331                    | eupathdb                  |         |          |        |
| <i>Cytauxzoon felis</i> strain Winnie           | CF002938                     | eupathdb                  |         |          |        |
| <i>Theileria parva</i> strain Muguga            | TP02_0426                    | eupathdb                  |         |          |        |
| <i>Babesia bigemina</i> strain BOND             | BBBOND_0400230               | eupathdb                  |         |          |        |
| <i>Theileria orientalis</i> strain Shintoku     | TOT_030000548                | eupathdb                  |         |          |        |
| <i>Eimeria falciformis</i> Bayer Haberkorn_1970 | EfaB_PLUS_24117.g1976        | eupathdb                  |         |          |        |
| <i>Theileria equi</i> strain WA                 | BEWA_015050                  | eupathdb                  |         |          |        |
| <i>Babesia bovis</i> T2Bo                       | BBOV_IV007840                | eupathdb                  |         |          |        |
| <i>Babesia microti</i> strain RI                | BBM_III02825                 | eupathdb                  |         |          |        |
| <i>Theileria annulata</i>                       | tann.chr03(622621...622962)  |                           |         | genedb   |        |
| <i>Neospora caninum</i>                         | BN1204_048985                | genbank                   |         |          |        |
| <i>Eimeria tenella</i>                          | CD346117.1                   |                           | genbank |          |        |
| <i>Perkinsus marinus</i>                        | PMAR011745                   | genbank                   |         |          |        |
| <i>Oxyrrhis marina</i>                          | EG742930.1                   |                           | genbank |          |        |
| <i>Karlodinium veneficum</i>                    | EC156715.1                   |                           | genbank |          |        |
| <i>Alexandrium tamarense</i>                    | CK783256.1                   |                           | genbank |          |        |

## Document S1. gDNA and cDNA sequences of *Pb mpodd*, *Pf mpodd* and *Tg mpodd*.

Sequencing results of cDNA and gDNA from mixed blood stages and cultured *T. gondii*.

### *Plasmodium berghei* ANKA

*Pb mpodd*, genomic sequence

```
ATGTTTAAATTACCATTTTATAGCTTTAACAAAAATTCATTGTTGGTTCAATGCTGTAAAGGAGCAGTTGCTTAT
TATATTCGCAAAACTTAGTAGTTATTAGCATTTTTTTTTTATTACCAATATAATgtaaagcacaaaaatattaa
aattaagaaaaataaattattacacacaattgtagatataatctttataataaaaaattgtttttttatcttt
ttttcattttaattatattatagAAAAGCCAACCTAACCAAGTGGAAAAGAGGGTGCGAATACAAAACAGTGATGAAT
CAATAAATAATTTTTTAAAGGAAAACAGTTAACAAAGGACAACATCGAAATACAAAAAACGAAACATATATA
CCGTATCCCTGATATAA
```

*Pb mpodd*, open reading frame, mRNA

```
ATGTTTAAATTACCATTTTATAGCTTTAACAAAAATTCATTGTTGGTTCAATGCTGTAAAGGAGCAGTTGCTTAT
TATATTCGCAAAACTTAGTAGTTATTAGCATTTTTTTTTTATTACCAATATAATAAAAGCCAACCTAACCAAGTGG
AAGAGGGTGCGAATACAAAACAGTGATGAATCAATAAATAATTTTTTAAAGGAAAACAGTTAACAAAGGACAAC
ATCGAAATACAAAAAACGAAACATATATACCGTATCCCTGATATAA
```

### *Plasmodium falciparum* 3D7

*Pf3D7 mpodd*, genomic sequence

```
ATGATTAAATTACCTTTTTATAGTTTTTAATAAAAAATTCCTTACTTGTACAATGTTTGAATCAGCATGTGTATAT
TACATCCCTCAGAATTTATTGGTTCTTAGTGCTTTTTATTTTTTATAAATATAAGgtaatatatacacatataat
atataatgtgtgtgtatgtttttttttttttttgtttatgtttgaatgctcttatgttttaaaataatattttta
tttgtttagAAAAGTCAATTTACTAATGGCAAAAGGATTCCTATAACAACTGCAATGAAGCAATACATAATTTT
GTGGTTGAAAAAAATTAATAAAGATGACATACAAATACAGAAAAAAAAAATGTATACATCATATCGTTAGTT
TGA
```

*Pf3D7 mpodd*, open reading frame, mRNA

```
ATGATTAAATTACCTTTTTATAGTTTTTAATAAAAAATTCCTTACTTGTACAATGTTTGAATCAGCATGTGTATAT
TACATCCCTCAGAATTTATTGGTTCTTAGTGCTTTTTATTTTTTATAAATATAAGAAAAGTCAATTTACTAATGGC
AAAAGGATTCCTATAACAACTGCAATGAAGCAATACATAATTTTGTGGTTGAAAAAAATTAATAAAGATGAC
ATACAAATACAGAAAAAAAAAATGTATACATCATATCGTTAGTTTGA
```

*Pf3D7 mpodd*, synthesized sequence (GeneArt)

```
ATGATTAAATTACCTTTTTATAGTTTTTAATAAAAAATTCCTTACTTGTACAATGTTTGAATCAGCATGTGTATAT
TACATCCCTCAGAATTTATTGGTTCTTAGTGCTTTTTATTTTTTATAAATATAAAAGTCAATTTACTAATGGCAAA
AGGATTCCTATAACAACTGCAATGAAGCAATACATAATTTTGTGGTTGAAAAAAATTAATAAAGATGACATA
CAAATACAGAAAAAAAAAATGTATACATCATATCGTTAGTTTGA
```

### *Toxoplasma gondii* GT1

*Tg mpodd*, genomic sequence

```
ATGAGAGTTCCTGGATTTCCCTCCCTCACTTTCCGAGCAGACTCGTTACTCGTTCAGTGCTGCATCGCCGCATGC
GTCTGgtaagccaaccgcggtcatgttttgcttcccttcagccggagctgtcttgcgggggagcacccttgaca
agaacacggagctggcaatcgtgcagatggcatgctctcgcgagagtgctgcggctggaatctcgcacgcagttc
tgtgtttctctttcgactgtccctgtagcgcgaactctcttcacgggtgccgtagaaaggaagccccgaatttgc
catctggaagcgaaaaaccgcgcgggaaacgaaattcggaaatacctaattgggcaggcagcagtcgacagagcc
gagaggcttgataccttttgcgttgtagtctttgaacggaccgctctctcgattgatttcgctgcccgaaccgga
cgtaaagaactccagaattctttgcccagctctcgcggcttcggaggcggcactccttgaatgcaacttctctctg
cgtggttttcggctgacttacgaggctctcaaaggctccgagttttttgtgcatatccaagctttcataatgattg
gaaatctagtgccggcgcttccccagctctgttgcaaagcattcactgtgttccccgtatactctgcaagtagttc
```



ggtgtataagctgatcatcgtgactcctagagccactgaatgccacaagcgccgaacattctatcagccttcca  
tgatgtggtgatatacctaatagcagGTATGGTCCTCAAGATGCAGCGGCCGTTGGGCTCATGTACTGGCTGGGACG  
TCAGgtacgtgcaggagattcatgattttttccttttctgcaggactcgttcccccttggcaccaaatcgcccat  
gttttgatacatttgcatgtctgcagccacacaccatcatatatgaagaaacacgaacaaatgtagatacgtat  
atagagatattcagagatatttgtgtctgatgtagacgcccgtgctggtcgcaggcaactatggtccagggaaaa  
agctgtgcctttcaggcttgtcaaagtcttgtcacgcgagcttgggtgtgtcgtaccaacgctagtgtatgcatgt  
gagagaccgtcgtagcggcattcgcctatatatatatatatatatatatatatatatttattcat  
gcagagagagacttgtactcacactttctggctgaaaagagaggttaaccccagtcgctgtccagatgcaagcaag  
tatttattcaaggatctcgtctctgatacacaagacgcgtccctcacagctcggccacttacctatacgggcatca  
tggatttcgtatgcggcgctgcgacttcaccgttgtcatccggggcgcccgtagcgtaacaggggggggacgag  
aggtttctcogaacttttgttctgcctttgtttcattagagtttgttccagctctgcagttagacaagtcgaact  
tcatgtggtacaaaagtaacgcgtgcagggggtgtctggggaacacagagaatttccggtgtgtctgttttagtaccg  
cacttacacatgcgtgcgtcgaacaggaagagatatggaaatgcagatggttggaaacgagattggtgagcaatat  
gttgtggtcacagCACGGCAAGAAAGTGACGCCTCCTCACAAGCTCGCTTCTGACGGCCAGACAGCCCTCCAGGA  
CTTCCTTAGACGCAAGAACCTTACTAGCCAGCAGGTCACAGTGGACTGGAAAGGCGCCAACGGCTACGTGAATCT  
CCGAAGCTGA

*Tg mpodd*, open reading frame, mRNA

ATGAGAGTTCCTGGATTTCCCTCACTTTCCGAGCAGACTCGTTACTCGTTCAGTGC  
TGCATCGCCGCATGCGTCTGGTATGGTCCTCAAGATGCAGCGGCCGTTGGGCTCATGTAC  
TGGCTGGGACGTCAGCACGGCAAGAAAGTGACGCCTCCTCACAAGCTCGCTTCTGACGGC  
CAGACAGCCCTCCAGGACTTCTTAGACGCAAGAACCTTACTAGCCAGCAGGTCACAGTG  
GACTGGAAAGGCGCCAACGGCTACGTGAATCTCCGAAGCTGA

Introns are displayed in small letters and highlighted in grey.

Exons are displayed in capitals.
